# Supplementary material for: Oral Microbiota Development in Early Childhood
Source: PubMed Central journal article supplement (PMC6911045; doi:10.1038/s41598-019-54702-0), 2019-12-13
Supplement: 41598_2019_54702_MOESM1_ESM.pdf [file 41598_2019_54702_MOESM1_ESM.pdf]

## ORAL MICROBIOTA DEVELOPMENT IN EARLY CHILDHOOD

Beatrice Kennedy<sup>1\*</sup>, Sari Peura<sup>1, 2</sup>, Ulf Hammar<sup>1</sup>, Silvia Vicenzi<sup>1,3</sup>, Anna Hedman<sup>4</sup>, Catarina Almqvist<sup>4, 5</sup>, Ellika Andolf<sup>6</sup>, Göran Pershagen<sup>7</sup>, Johan Dicksved<sup>8</sup>, Stefan Bertilsson<sup>9</sup>, Tove Fall<sup>1</sup>.

<sup>1</sup> Department of Medical Sciences, Molecular Epidemiology and Science for Life Laboratory, Uppsala University, Uppsala, Sweden.

<sup>2</sup> Department of Forest Mycology and Plant Pathology, Science for Life Laboratory, Swedish University of Agricultural Sciences, Uppsala, Sweden.

<sup>3</sup> School of Medicine, University of Tasmania, Hobart, Australia.

<sup>4</sup> Department of Medical Epidemiology and Biostatistics, Karolinska Institutet, Stockholm, Sweden.

<sup>5</sup> Unit of Pediatric Allergy and Pulmonology at Astrid Lindgren Children's Hospital, Karolinska University Hospital, Stockholm, Sweden.

<sup>6</sup> Department of Clinical Sciences, Danderyd Hospital, Stockholm, Sweden.

<sup>7</sup> Institute of Environmental Medicine, Karolinska Institutet, Stockholm, Sweden.

<sup>8</sup> Department of Animal Nutrition and Management, Swedish University of Agricultural Sciences, Uppsala, Sweden.

<sup>9</sup> Department of Ecology and Genetics, Limnology, Uppsala University, Uppsala, Sweden.

\* Corresponding author: [beatrice.kennedy@medsci.uu.se](mailto:beatrice.kennedy@medsci.uu.se)

## **SUPPLEMENTARY INFORMATION**

### **Saliva sample instructions**

Parents were instructed to take the first saliva sample from their child the evening before their planned visit to the test centre, just before bedtime but not within 30 minutes of eating or brushing their teeth. The second saliva sample was to be collected the same morning as their visit, within 15 minutes after waking up and before the first meal of the day. Parents were given the sampling kit by the test centre and were instructed to let the child suck on a cotton swab for one minute to saturate it with saliva and then to store it in a plastic tube, marked with the date and time, at standard refrigerator temperature. Mothers followed similar instructions at sampling of their saliva during pregnancy.

### **PCR protocol**

The v3 and v4 regions of 16S rRNA gene were amplified using a two-step PCR protocol. In the first PCR, 16S rRNA target region was amplified using primers 341F and 805R<sup>24</sup>. The protocol included initial denaturation at 98 °C for 30 s, followed by 20 cycles of 98 °C for 10 s, 62 °C for 30 s and 72 °C for 30 s. Final elongation was 2 min at 72 °C. After purification with AMPure beads (Agencourt) following manufacture protocol, a second PCR was performed to add sample-specific DNA barcodes. This PCR included initial denaturation at 98 °C for 30 s, followed by 15 cycles of 98 °C for 10 s, 66 °C for 30 s and 72 °C for 30 s and final elongation was 2 min at 72 °C.

SUPPLEMENTARY FIGURES

Figure S1.

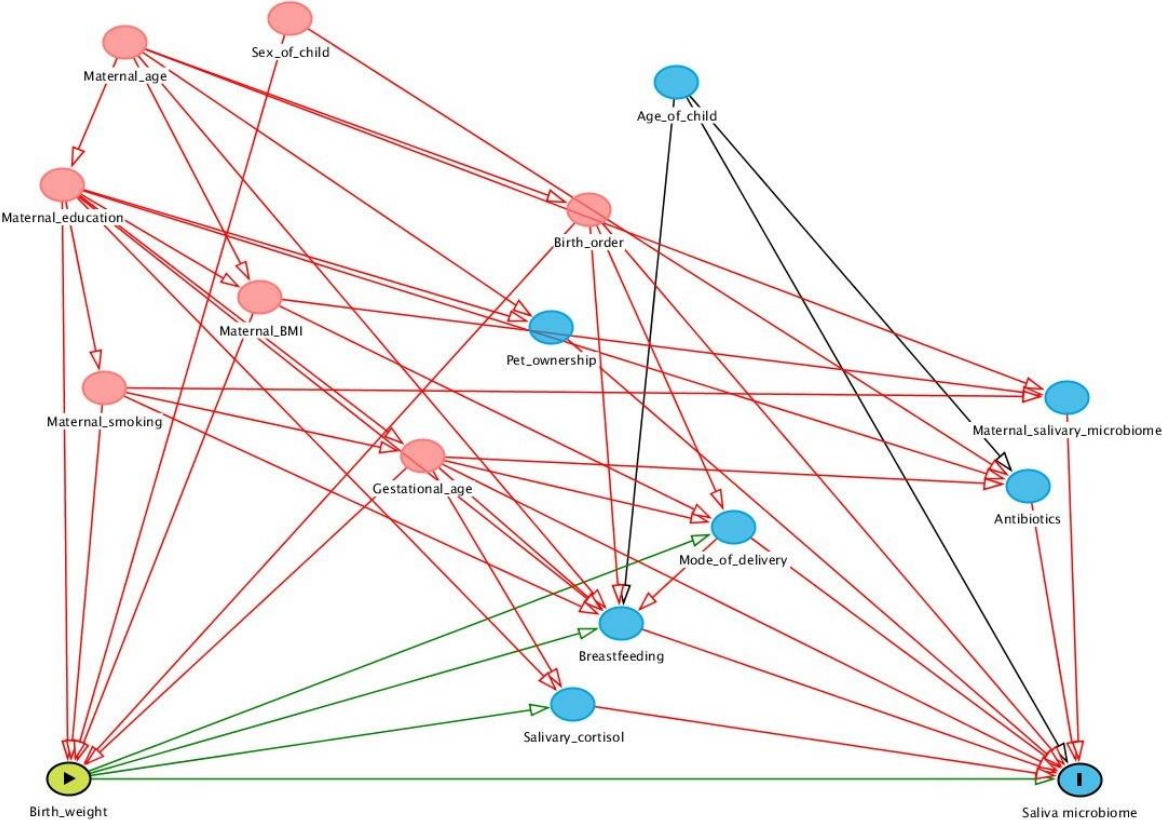

Directed acyclic graph of theoretical framework.

Figure S2.

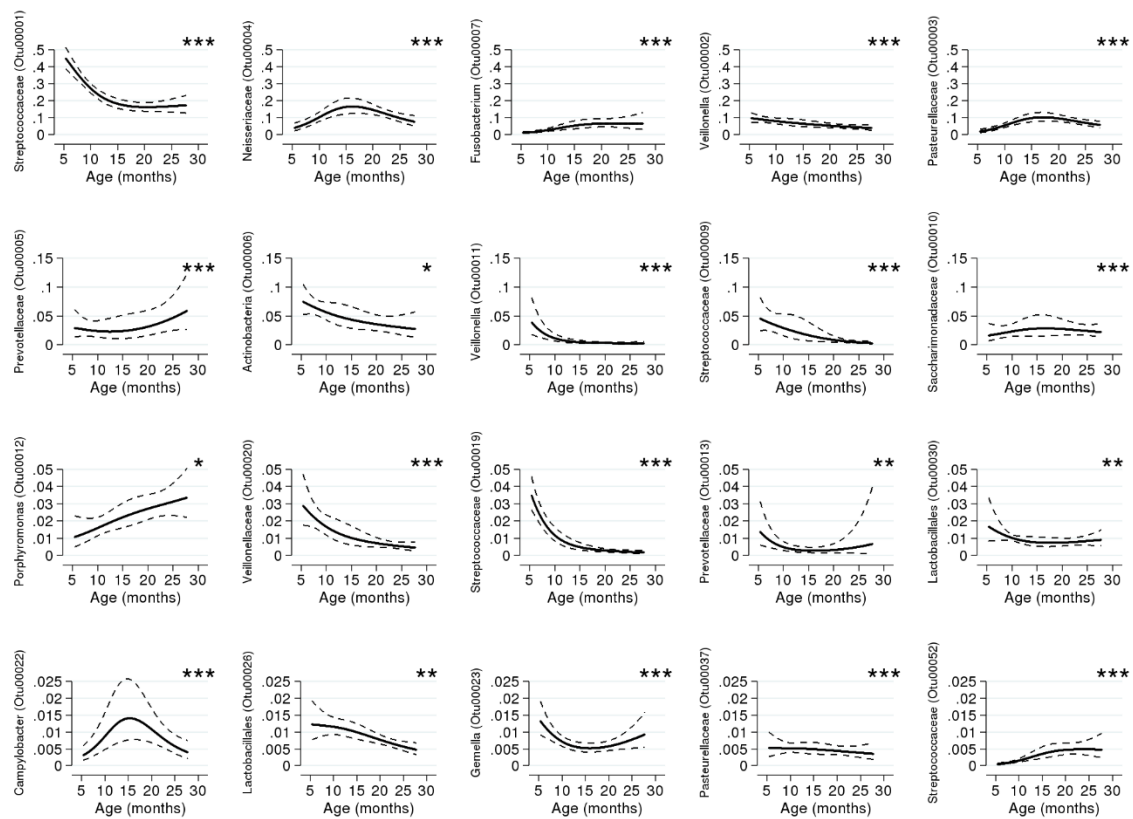

Relative abundance of the 20 most common OTUs plotted against age. Lines indicate mean values and 95% confidence intervals. The y-axis shows the relative abundance in proportion. \* p < 0.05, \*\* p < 0.01, \*\*\* p < 0.001.

**Figure S3.**

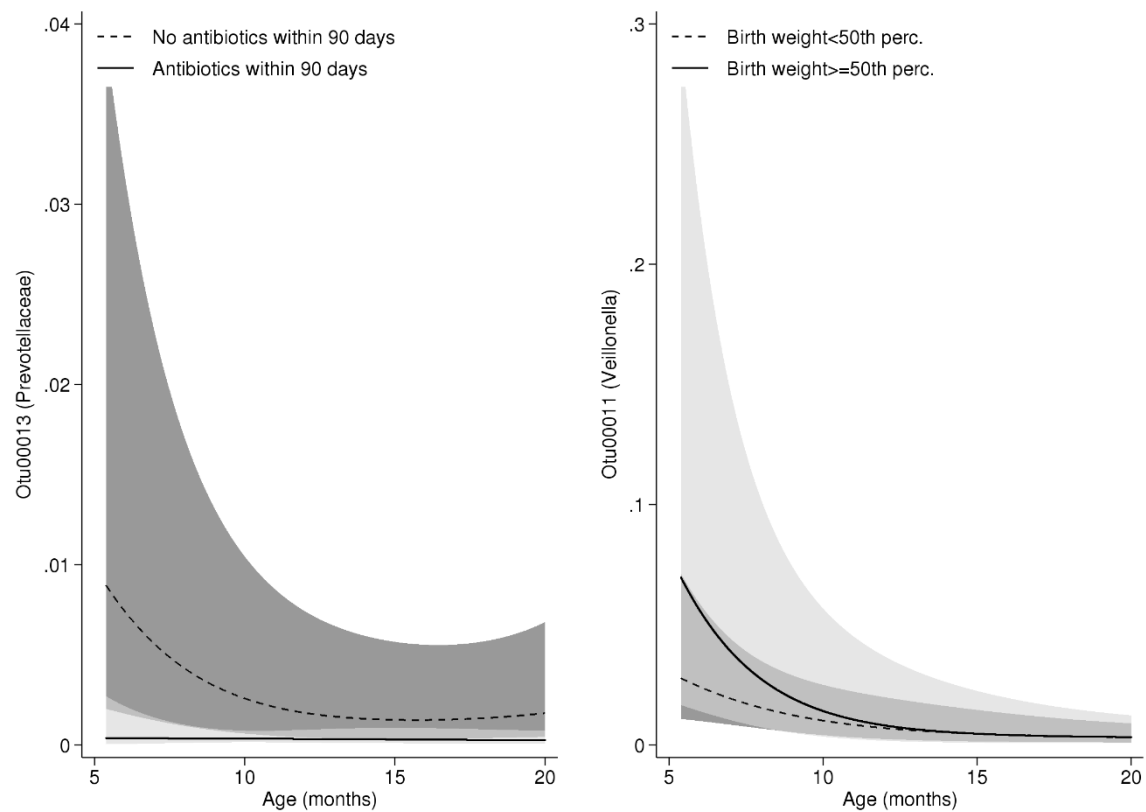

**The interactions between antibiotics within 90 days, the child's age, and an OTU within the Prevotellaceae family, and birth weight, the child's age, and an OTU within the Veillonella genus, respectively. The y-axis shows the relative abundance in proportion.**

## SUPPLEMENTARY TABLES

**Supplementary table 1. The 20 most common operational taxonomic units (OTUs)**

| OTU number | Highest resolved taxonomic level | Genus              | Family             | Order                 | Class               | Phylum             |
|------------|----------------------------------|--------------------|--------------------|-----------------------|---------------------|--------------------|
| Otu00001   | Family                           | -                  | Streptococcaceae   | Lactobacillales       | Bacilli             | Firmicutes         |
| Otu00002   | Genus                            | Veillonella        | Veillonellaceae    | Selenomonadales       | Negativicutes       | Firmicutes         |
| Otu00003   | Family                           | -                  | Pasteurellaceae    | Pasteurellales        | Gammaproteobacteria | Proteobacteria     |
| Otu00004   | Family                           | -                  | Neisseriaceae      | Betaproteobacteriales | Gammaproteobacteria | Proteobacteria     |
| Otu00005   | Genus                            | -                  | Prevotellaceae     | Bacteroidales         | Bacteroidia         | Bacteroidetes      |
| Otu00006   | Class                            | -                  | -                  | -                     | Actinobacteria      | Actinobacteria     |
| Otu00007   | Genus                            | Fusobacterium      | Fusobacteriaceae   | Fusobacteriales       | Fusobacteriia       | Fusobacteria       |
| Otu00009   | Family                           | -                  | Streptococcaceae   | Lactobacillales       | Bacilli             | Firmicutes         |
| Otu00010   | Genus                            | Saccharimonadaceae | Saccharimonadaceae | Saccharimonadales     | Saccharimonadia     | Patescibacteria    |
| Otu00011   | Genus                            | Veillonella        | Veillonellaceae    | Selenomonadales       | Negativicutes       | Firmicutes         |
| Otu00012   | Genus                            | Porphyromonas      | Porphyromonadaceae | Bacteroidales         | Bacteroidia         | Bacteroidetes      |
| Otu00013   | Family                           | -                  | Prevotellaceae     | Bacteroidales         | Bacteroidia         | Bacteroidetes      |
| Otu00019   | Family                           | -                  | Streptococcaceae   | Lactobacillales       | Bacilli             | Firmicutes         |
| Otu00020   | Family                           | -                  | Veillonellaceae    | Selenomonadales       | Negativicutes       | Firmicutes         |
| Otu00022   | Genus                            | Campylobacter      | Campylobacteraceae | Campylobacterales     | Campylobacteria     | Epsilonbacteraeota |
| Otu00023   | Genus                            | Gemella            | Family_XI          | Bacillales            | Bacilli             | Firmicutes         |
| Otu00026   | Order                            | -                  | -                  | Lactobacillales       | Bacilli             | Firmicutes         |
| Otu00030   | Order                            | -                  | -                  | Lactobacillales       | Bacilli             | Firmicutes         |
| Otu00037   | Family                           | -                  | Pasteurellaceae    | Pasteurellales        | Gammaproteobacteria | Proteobacteria     |
| Otu00052   | Family                           | -                  | Streptococcaceae   | Lactobacillales       | Bacilli             | Firmicutes         |

**Supplementary table 2. Results from regression analyses.**

| Exposure                      | Outcome                           | p-value main analysis | Direction | N                   | p-value sensitivity analysis | Significant † |
|-------------------------------|-----------------------------------|-----------------------|-----------|---------------------|------------------------------|---------------|
| <b>Age (months)</b>           | Alpha diversity (inverse Simpson) | 1x10 <sup>-13</sup>   |           | 59                  | 3x10 <sup>-12</sup>          | 1             |
|                               | Beta diversity (NMDS)             | 6x10 <sup>-61</sup>   |           | 59                  | 6x10 <sup>-36</sup>          | 1             |
|                               | OTU00001                          | 3x10 <sup>-16</sup>   |           | 59                  | 2x10 <sup>-10</sup>          | 1             |
|                               | OTU00002                          | 2x10 <sup>-4</sup>    |           | 59                  | 5x10 <sup>-3</sup>           | 1             |
|                               | OTU00003                          | 2x10 <sup>-6</sup>    |           | 59                  | 4x10 <sup>-10</sup>          | 1             |
|                               | OTU00004                          | 2x10 <sup>-4</sup>    |           | 59                  | 3x10 <sup>-7</sup>           | 1             |
|                               | OTU00005                          | 0.23                  |           | 59                  | 0.02                         | 0             |
|                               | OTU00006                          | 0.02                  |           | 59                  | 5x10 <sup>-3</sup>           | 1             |
|                               | OTU00007                          | 2x10 <sup>-7</sup>    |           | 59                  | 3x10 <sup>-10</sup>          | 1             |
|                               | OTU00009                          | 3x10 <sup>-10</sup>   |           | 59                  | 1x10 <sup>-3</sup>           | 1             |
|                               | OTU00010                          | 0.66                  |           | 59                  | 1x10 <sup>-4</sup>           | 0             |
|                               | OTU00011                          | 2x10 <sup>-7</sup>    |           | 59                  | 6x10 <sup>-4</sup>           | 1             |
|                               | OTU00012                          | 0.01                  |           | 59                  | 3x10 <sup>-8</sup>           | 1             |
|                               | OTU00013                          | 3x10 <sup>-3</sup>    |           | 59                  | 0.97                         | 0             |
|                               | OTU00019                          | 1x10 <sup>-29</sup>   |           | 59                  | 1x10 <sup>-15</sup>          | 1             |
|                               | OTU00020                          | 5x10 <sup>-9</sup>    |           | 59                  | 2x10 <sup>-3</sup>           | 1             |
|                               | OTU00022                          | 6x10 <sup>-5</sup>    |           | 59                  | 1x10 <sup>-4</sup>           | 1             |
|                               | OTU00023                          | 8x10 <sup>-4</sup>    |           | 59                  | 0.40                         | 0             |
|                               | OTU00026                          | 1x10 <sup>-3</sup>    |           | 59                  | 9x10 <sup>-3</sup>           | 1             |
|                               | OTU00030                          | 0.17                  |           | 59                  | 0.37                         | 0             |
| OTU00037                      | 0.56                              |                       | 59        | 0.04                | 0                            |               |
| OTU00052                      | 8x10 <sup>-12</sup>               |                       | 59        | 6x10 <sup>-10</sup> | 1                            |               |
|                               | Proportion of phyla               | 3x10 <sup>-32</sup>   |           | 59                  | 6x10 <sup>-21</sup>          | 1             |
| <b>Antibiotics (ever-use)</b> | Alpha diversity (inverse Simpson) | 0.13                  | -         | 59                  | 0.48                         | 0             |
|                               | Beta diversity (NMDS)             | 0.25                  |           | 59                  | 0.06                         | 0             |
|                               | OTU00001                          | 0.99                  | +         | 59                  | 0.74                         | 0             |

|                                     |                                   |        |   |    |      |   |
|-------------------------------------|-----------------------------------|--------|---|----|------|---|
|                                     | OTU00002                          | 0.94   | - | 59 | 0.34 | 0 |
|                                     | OTU00003                          | 0.11   | + | 59 | 0.14 | 0 |
|                                     | OTU00004                          | 0.03   | + | 59 | 0.10 | 0 |
|                                     | OTU00005                          | 0.44   | - | 59 | 0.51 | 0 |
|                                     | OTU00006                          | 0.77   | - | 59 | 0.98 | 0 |
|                                     | OTU00007                          | 0.42   | - | 59 | 0.36 | 0 |
|                                     | OTU00009                          | 0.01   | - | 59 | 0.10 | 0 |
|                                     | OTU00010                          | 0.79   | - | 59 | 0.22 | 0 |
|                                     | OTU00011                          | 0.32   | + | 59 | 0.90 | 0 |
|                                     | OTU00012                          | 0.51   | + | 59 | 0.88 | 0 |
|                                     | OTU00013                          | 9x10-4 | - | 59 | 0.07 | 0 |
|                                     | OTU00019                          | 0.97   | - | 59 | 0.94 | 0 |
|                                     | OTU00020                          | 0.02   | - | 59 | 0.13 | 0 |
|                                     | OTU00022                          | 0.36   | - | 59 | 0.27 | 0 |
|                                     | OTU00023                          | 0.65   | - | 59 | 0.96 | 0 |
|                                     | OTU00026                          | 0.75   | - | 59 | 0.92 | 0 |
|                                     | OTU00030                          | 6x10-3 | - | 59 | 0.12 | 0 |
|                                     | OTU00037                          | 0.47   | - | 59 | 0.73 | 0 |
|                                     | OTU00052                          | 0.63   | + | 59 | 0.04 | 0 |
|                                     | Proportion of phyla               | 0.29   |   | 59 | 0.54 | 0 |
| <b>Antibiotics (within 90 days)</b> | Alpha diversity (inverse Simpson) | 0.66   | - | 59 | 0.91 | 0 |
|                                     | Beta diversity (NMDS)             | 0.05   |   | 59 | 0.01 | 0 |
|                                     | OTU00001                          | 0.97   | - | 59 | 0.60 | 0 |
|                                     | OTU00002                          | 0.33   | + | 59 | 0.57 | 0 |
|                                     | OTU00003                          | 5x10-3 | + | 59 | 0.03 | 1 |
|                                     | OTU00004                          | 0.01   | + | 59 | 0.05 | 1 |
|                                     | OTU00005                          | 0.02   | - | 59 | 0.53 | 0 |
|                                     | OTU00006                          | 0.67   | + | 59 | 0.62 | 0 |
|                                     | OTU00007                          | 0.84   | + | 59 | 0.90 | 0 |
|                                     | OTU00009                          | 0.03   | - | 59 | 0.75 | 0 |



|                            |                                   |         |   |    |        |   |
|----------------------------|-----------------------------------|---------|---|----|--------|---|
|                            | OTU00010                          | 0.87    | + | 59 | 0.62   | 0 |
|                            | OTU00011                          | 0.14    | + | 59 | 0.28   | 0 |
|                            | OTU00012                          | 0.45    | + | 59 | 0.92   | 0 |
|                            | OTU00013                          | 6x10-5  | - | 59 | 0.02   | 1 |
|                            | OTU00019                          | 0.79    | + | 59 | 0.16   | 0 |
|                            | OTU00020                          | 0.04    | - | 59 | 0.13   | 0 |
|                            | OTU00022                          | 0.82    | - | 59 | 0.57   | 0 |
|                            | OTU00023                          | 0.97    | - | 59 | 0.60   | 0 |
|                            | OTU00026                          | 0.78    | + | 59 | 0.37   | 0 |
|                            | OTU00030                          | 4x10-3  | - | 59 | 0.16   | 0 |
|                            | OTU00037                          | 0.79    | - | 59 | 0.83   | 0 |
|                            | OTU00052                          | 0.22    | + | 59 | 0.18   | 0 |
|                            | Proportion of phyla               | 8x10-3  |   | 59 | 0.04   | 1 |
| <b>Birth weight (gram)</b> | Alpha diversity (inverse Simpson) | 0.17    |   | 59 | 0.35   | 0 |
|                            | Beta diversity (NMDS)             | 0.14    |   | 59 | 0.35   | 0 |
|                            | OTU00001                          | 0.28    |   | 59 | 0.38   | 0 |
|                            | OTU00002                          | 3x10-3  |   | 59 | 0.05   | 1 |
|                            | OTU00003                          | 0.93    |   | 59 | 0.85   | 0 |
|                            | OTU00004                          | 0.37    |   | 59 | 0.68   | 0 |
|                            | OTU00005                          | 0.04    |   | 59 | 0.11   | 0 |
|                            | OTU00006                          | 0.52    |   | 59 | 0.58   | 0 |
|                            | OTU00007                          | 0.80    |   | 59 | 0.37   | 0 |
|                            | OTU00009                          | 0.71    |   | 59 | 0.27   | 0 |
|                            | OTU00010                          | 0.05    |   | 59 | 0.33   | 0 |
|                            | OTU00011                          | 7x10-13 |   | 59 | 1x10-4 | 1 |
|                            | OTU00012                          | 0.20    |   | 59 | 0.10   | 0 |
|                            | OTU00013                          | 0.07    |   | 59 | 0.03   | 0 |
|                            | OTU00019                          | 0.51    |   | 59 | 0.36   | 0 |
|                            | OTU00020                          | 0.81    |   | 59 | 0.33   | 0 |
|                            | OTU00022                          | 0.17    |   | 59 | 0.24   | 0 |

|                                |                                   |        |   |    |        |   |
|--------------------------------|-----------------------------------|--------|---|----|--------|---|
|                                | OTU00023                          | 9x10-3 |   | 59 | 0.31   | 0 |
|                                | OTU00026                          | 1x10-3 |   | 59 | 0.05   | 1 |
|                                | OTU00030                          | 0.02   |   | 59 | 4x10-3 | 1 |
|                                | OTU00037                          | 0.36   |   | 59 | 0.25   | 0 |
|                                | OTU00052                          | 4x10-9 |   | 59 | 0.07   | 0 |
|                                | Proportion of phyla               | 2x10-5 |   | 59 | 0.09   | 0 |
| <b>Exclusive breastfeeding</b> | Alpha diversity (inverse Simpson) | 0.51   | - | 49 | 0.09   | 0 |
|                                | Beta diversity (NMDS)             | 0.02   |   | 49 | 4x10-3 | 1 |
|                                | OTU00001                          | 0.36   | + | 49 | 0.28   | 0 |
|                                | OTU00002                          | 0.95   | - | 49 | 0.44   | 0 |
|                                | OTU00003                          | 0.68   | - | 49 | 0.60   | 0 |
|                                | OTU00004                          | 0.03   | + | 49 | 0.10   | 0 |
|                                | OTU00005                          | 0.07   | - | 49 | 0.14   | 0 |
|                                | OTU00006                          | 0.86   | - | 49 | 0.90   | 0 |
|                                | OTU00007                          | 0.98   | - | 49 | 0.21   | 0 |
|                                | OTU00009                          | 0.54   | + | 49 | 0.57   | 0 |
|                                | OTU00010                          | 8x10-3 | - | 49 | 0.52   | 0 |
|                                | OTU00011                          | 0.37   | + | 49 | 0.29   | 0 |
|                                | OTU00012                          | 0.82   | + | 49 | 0.54   | 0 |
|                                | OTU00013                          | 0.02   | + | 49 | 0.43   | 0 |
|                                | OTU00019                          | 0.53   | + | 49 | 0.23   | 0 |
|                                | OTU00020                          | 0.04   | - | 49 | 0.07   | 0 |
|                                | OTU00022                          | 0.94   | - | 49 | 0.49   | 0 |
|                                | OTU00023                          | 0.95   | + | 49 | 0.17   | 0 |
|                                | OTU00026                          | 3x10-3 | + | 49 | 0.11   | 0 |
|                                | OTU00030                          | 0.34   | + | 49 | 0.62   | 0 |
|                                | OTU00037                          | 4x10-3 | + | 49 | 0.16   | 0 |
|                                | OTU00052                          | 0.19   | + | 49 | 0.77   | 0 |
|                                | Proportion of phyla               | 5x10-3 |   | 49 | 0.02   | 1 |

|                                |                                   |                    |   |    |                    |   |
|--------------------------------|-----------------------------------|--------------------|---|----|--------------------|---|
| <b>Furry pet</b>               | Alpha diversity (inverse Simpson) | 0.15               | + | 49 | 0.44               | 0 |
|                                | Beta diversity (NMDS)             | 0.54               |   | 49 | 0.95               | 0 |
|                                | OTU00001                          | 0.85               | - | 49 | 0.42               | 0 |
|                                | OTU00002                          | 0.57               | - | 49 | 0.70               | 0 |
|                                | OTU00003                          | 0.01               | - | 49 | 0.04               | 1 |
|                                | OTU00004                          | 0.98               | + | 49 | 0.91               | 0 |
|                                | OTU00005                          | 0.77               | - | 49 | 0.56               | 0 |
|                                | OTU00006                          | 0.03               | - | 49 | 0.03               | 0 |
|                                | OTU00007                          | 0.34               | + | 49 | 0.74               | 0 |
|                                | OTU00009                          | 0.06               | + | 49 | 0.73               | 0 |
|                                | OTU00010                          | 0.73               | - | 49 | 0.68               | 0 |
|                                | OTU00011                          | 0.34               | + | 49 | 0.56               | 0 |
|                                | OTU00012                          | 0.04               | + | 49 | 0.42               | 0 |
|                                | OTU00013                          | 0.07               | + | 49 | 0.58               | 0 |
|                                | OTU00019                          | 0.09               | + | 49 | 0.87               | 0 |
|                                | OTU00020                          | 0.10               | - | 49 | 0.64               | 0 |
|                                | OTU00022                          | 0.61               | - | 49 | 0.82               | 0 |
|                                | OTU00023                          | 0.38               | - | 49 | 0.68               | 0 |
|                                | OTU00026                          | 0.21               | - | 49 | 0.20               | 0 |
|                                | OTU00030                          | 0.58               | - | 49 | 0.21               | 0 |
|                                | OTU00037                          | 0.49               | - | 49 | 0.31               | 0 |
|                                | OTU00052                          | 0.79               | - | 49 | 0.51               | 0 |
|                                | Proportion of phyla               | 2x10 <sup>-5</sup> |   | 49 | 0.27               | 0 |
| <b>Gestational age (weeks)</b> | Alpha diversity (inverse Simpson) | 0.23               |   | 59 | 0.28               | 0 |
|                                | Beta diversity (NMDS)             | 3x10 <sup>-3</sup> |   | 59 | 6x10 <sup>-7</sup> | 1 |
|                                | OTU00001                          | 0.07               |   | 59 | 0.20               | 0 |
|                                | OTU00002                          | 0.25               |   | 59 | 0.27               | 0 |
|                                | OTU00003                          | 0.07               |   | 59 | 4x10 <sup>-4</sup> | 0 |
|                                | OTU00004                          | 0.57               |   | 59 | 0.42               | 0 |

|                                                   |                                   |                     |    |                     |   |
|---------------------------------------------------|-----------------------------------|---------------------|----|---------------------|---|
|                                                   | OTU00005                          | 0.04                | 59 | 0.02                | 0 |
|                                                   | OTU00006                          | 0.27                | 59 | 0.80                | 0 |
|                                                   | OTU00007                          | 0.06                | 59 | 0.45                | 0 |
|                                                   | OTU00009                          | 0.19                | 59 | 0.97                | 0 |
|                                                   | OTU00010                          | 5x10 <sup>-4</sup>  | 59 | 5x10 <sup>-5</sup>  | 1 |
|                                                   | OTU00011                          | 0.80                | 59 | 0.55                | 0 |
|                                                   | OTU00012                          | 0.01                | 59 | 0.04                | 1 |
|                                                   | OTU00013                          | 0.52                | 59 | 0.04                | 0 |
|                                                   | OTU00019                          | 0.41                | 59 | 0.01                | 0 |
|                                                   | OTU00020                          | 0.64                | 59 | 0.95                | 0 |
|                                                   | OTU00022                          | 4x10 <sup>-5</sup>  | 59 | 0.55                | 0 |
|                                                   | OTU00023                          | 0.28                | 59 | 0.31                | 0 |
|                                                   | OTU00026                          | 0.46                | 59 | 0.72                | 0 |
|                                                   | OTU00030                          | 0.66                | 59 | 0.02                | 0 |
|                                                   | OTU00037                          | 0.52                | 59 | 0.23                | 0 |
|                                                   | OTU00052                          | 0.06                | 59 | 0.65                | 0 |
|                                                   | Proportion of phyla               | 2x10 <sup>-21</sup> | 59 | 2x10 <sup>-14</sup> | 1 |
| <b>Maternal alpha diversity (inverse Simpson)</b> | Alpha diversity (inverse Simpson) | 0.66                | 55 | 0.70                | 0 |
| <b>Maternal beta diversity (NMDS1)</b>            | Beta diversity (NMDS)             | 0.07                | 55 | 0.02                | 0 |
| <b>Maternal beta diversity (NMDS2)</b>            | Beta diversity (NMDS)             | 0.09                | 55 | 0.26                | 0 |
| <b>Maternal OTU00001</b>                          | OTU00001                          | 0.55                | 55 | 0.69                | 0 |
| <b>Maternal OTU00002</b>                          | OTU00002                          | 0.73                | 55 | 0.68                | 0 |
| <b>Maternal OTU00003</b>                          | OTU00003                          | 0.21                | 55 | 0.23                | 0 |
| <b>Maternal OTU00004</b>                          | OTU00004                          | 0.12                | 55 | 0.63                | 0 |
| <b>Maternal OTU00005</b>                          | OTU00005                          | 0.52                | 55 | 0.24                | 0 |
| <b>Maternal OTU00006</b>                          | OTU00006                          | 0.36                | 55 | 0.55                | 0 |
| <b>Maternal OTU00007</b>                          | OTU00007                          | 0.74                | 55 | 0.58                | 0 |
| <b>Maternal OTU00009</b>                          | OTU00009                          | 6x10 <sup>-7</sup>  | 55 | 0.71                | 0 |
| <b>Maternal OTU00010</b>                          | OTU00010                          | 0.55                | 55 | 0.45                | 0 |

|                                     |                                   |      |   |    |      |   |
|-------------------------------------|-----------------------------------|------|---|----|------|---|
| <b>Maternal OTU00011</b>            | OTU00011                          | 0.02 |   | 55 | 0.78 | 0 |
| <b>Maternal OTU00012</b>            | OTU00012                          | 0.12 |   | 55 | 0.47 | 0 |
| <b>Maternal OTU00013</b>            | OTU00013                          | 0.03 |   | 55 | 0.06 | 0 |
| <b>Maternal OTU00019</b>            | OTU00019                          | 0.24 |   | 55 | 0.04 | 0 |
| <b>Maternal OTU00020</b>            | OTU00020                          | 0.17 |   | 55 | 0.57 | 0 |
| <b>Maternal OTU00022</b>            | OTU00022                          | 0.14 |   | 55 | 0.01 | 0 |
| <b>Maternal OTU00023</b>            | OTU00023                          | 0.32 |   | 55 | 0.09 | 0 |
| <b>Maternal OTU00026</b>            | OTU00026                          | 0.30 |   | 55 | 0.06 | 0 |
| <b>Maternal OTU00030</b>            | OTU00030                          | 0.24 |   | 55 | 0.05 | 0 |
| <b>Maternal OTU00037</b>            | OTU00037                          | 0.85 |   | 55 | 0.49 | 0 |
| <b>Maternal OTU00052</b>            | OTU00052                          | 0.13 |   | 55 | 0.71 | 0 |
| <b>Maternal proportion of phyla</b> | Proportion of phyla               | 0.12 |   | 55 |      | 0 |
| <b>Mode of delivery</b>             | Alpha diversity (inverse Simpson) | 0.63 | + | 59 | 0.32 | 0 |
|                                     | Beta diversity (NMDS)             | 0.59 |   | 59 | 0.34 | 0 |
|                                     | OTU00001                          | 0.90 | - | 59 | 0.66 | 0 |
|                                     | OTU00002                          | 1.00 | - | 59 | 1.00 | 0 |
|                                     | OTU00003                          | 0.77 | + | 59 | 0.52 | 0 |
|                                     | OTU00004                          | 0.23 | + | 59 | 0.18 | 0 |
|                                     | OTU00005                          | 0.05 | + | 59 | 0.02 | 0 |
|                                     | OTU00006                          | 0.61 | - | 59 | 0.87 | 0 |
|                                     | OTU00007                          | 0.10 | + | 59 | 0.42 | 0 |
|                                     | OTU00009                          | 0.36 | - | 59 | 0.04 | 0 |
|                                     | OTU00010                          | 0.52 | - | 59 | 0.08 | 0 |
|                                     | OTU00011                          | 0.74 | - | 59 | 0.85 | 0 |
|                                     | OTU00012                          | 0.42 | + | 59 | 0.41 | 0 |
|                                     | OTU00013                          | 0.53 | - | 59 | 0.18 | 0 |
|                                     | OTU00019                          | 0.69 | + | 59 | 0.51 | 0 |
|                                     | OTU00020                          | 0.08 | - | 59 | 0.55 | 0 |
|                                     | OTU00022                          | 0.29 | + | 59 | 0.44 | 0 |
|                                     | OTU00023                          | 0.30 | + | 59 | 0.22 | 0 |

|                                  |                                   |        |   |    |        |   |
|----------------------------------|-----------------------------------|--------|---|----|--------|---|
|                                  | OTU00026                          | 0.49   | - | 59 | 0.65   | 0 |
|                                  | OTU00030                          | 0.23   | - | 59 | 0.79   | 0 |
|                                  | OTU00037                          | 0.08   | - | 59 | 0.78   | 0 |
|                                  | OTU00052                          | 0.73   | - | 59 | 0.38   | 0 |
|                                  | Proportion of phyla               | 0.59   |   | 59 | 0.94   | 0 |
| <b>Morning salivary cortisol</b> | Alpha diversity (inverse Simpson) | 0.93   |   | 57 | 0.26   | 0 |
|                                  | Beta diversity (NMDS)             | 0.03   |   | 57 | 0.03   | 0 |
|                                  | OTU00001                          | 0.02   |   | 57 | 0.01   | 1 |
|                                  | OTU00002                          | 0.05   |   | 57 | 0.13   | 0 |
|                                  | OTU00003                          | 0.37   |   | 57 | 0.71   | 0 |
|                                  | OTU00004                          | 0.56   |   | 57 | 0.86   | 0 |
|                                  | OTU00005                          | 4x10-3 |   | 57 | 0.08   | 0 |
|                                  | OTU00006                          | 0.24   |   | 57 | 0.41   | 0 |
|                                  | OTU00007                          | 0.11   |   | 57 | 0.99   | 0 |
|                                  | OTU00009                          | 0.90   |   | 57 | 0.61   | 0 |
|                                  | OTU00010                          | 0.42   |   | 57 | 0.28   | 0 |
|                                  | OTU00011                          | 0.53   |   | 57 | 0.03   | 0 |
|                                  | OTU00012                          | 0.11   |   | 57 | 0.12   | 0 |
|                                  | OTU00013                          | 0.50   |   | 57 | 0.12   | 0 |
|                                  | OTU00019                          | 0.54   |   | 57 | 0.71   | 0 |
|                                  | OTU00020                          | 0.13   |   | 57 | 0.39   | 0 |
|                                  | OTU00022                          | 0.41   |   | 57 | 0.80   | 0 |
|                                  | OTU00023                          | 6x10-3 |   | 57 | 0.10   | 0 |
|                                  | OTU00026                          | 0.50   |   | 57 | 0.72   | 0 |
|                                  | OTU00030                          | 0.10   |   | 57 | 0.04   | 0 |
|                                  | OTU00037                          | 0.56   |   | 57 | 0.46   | 0 |
|                                  | OTU00052                          | 0.65   |   | 57 | 0.94   | 0 |
|                                  | Proportion of phyla               | 3x10-3 |   | 57 | 1x10-4 | 1 |
| <b>Parity</b>                    | Alpha diversity (inverse Simpson) | 0.66   | + | 59 | 0.61   | 0 |

|                       |      |   |    |      |   |
|-----------------------|------|---|----|------|---|
| Beta diversity (NMDS) | 0.98 |   | 59 | 0.93 | 0 |
| OTU00001              | 0.45 | + | 59 | 0.69 | 0 |
| OTU00002              | 0.79 | - | 59 | 0.99 | 0 |
| OTU00003              | 0.06 | - | 59 | 0.48 | 0 |
| OTU00004              | 0.14 | + | 59 | 0.25 | 0 |
| OTU00005              | 0.86 | + | 59 | 0.55 | 0 |
| OTU00006              | 0.74 | + | 59 | 0.32 | 0 |
| OTU00007              | 0.85 | + | 59 | 0.45 | 0 |
| OTU00009              | 0.59 | - | 59 | 0.83 | 0 |
| OTU00010              | 0.03 | + | 59 | 0.29 | 0 |
| OTU00011              | 0.08 | - | 59 | 0.95 | 0 |
| OTU00012              | 0.07 | + | 59 | 0.31 | 0 |
| OTU00013              | 0.20 | - | 59 | 0.69 | 0 |
| OTU00019              | 0.53 | + | 59 | 0.84 | 0 |
| OTU00020              | 0.65 | - | 59 | 0.24 | 0 |
| OTU00022              | 0.07 | + | 59 | 0.41 | 0 |
| OTU00023              | 0.86 | + | 59 | 0.20 | 0 |
| OTU00026              | 0.35 | + | 59 | 0.28 | 0 |
| OTU00030              | 0.33 | - | 59 | 0.99 | 0 |
| OTU00037              | 0.18 | - | 59 | 0.91 | 0 |
| OTU00052              | 0.58 | - | 59 | 0.28 | 0 |
| Proportion of phyla   | 0.92 |   | 59 | 0.99 | 0 |

† Significant result after FDR and sensitivity analysis. 1=yes. 2=no

**Supplementary table 3. Post hoc tests for phyla distribution.**

| <b>Exposure</b>                | <b>Phylum</b>                       | <b>p-value main analysis</b> | <b>p-value sensitivity analysis</b> |
|--------------------------------|-------------------------------------|------------------------------|-------------------------------------|
| <b>Age</b>                     | Actinobacteria                      | 0.35                         | 0.04                                |
|                                | Bacteria_unclassifie                | 0.66                         | 0.21                                |
|                                | Bacteroidetes                       | 0.52                         | 0.02                                |
|                                | <b>Epsilonbacteraeota</b>           | <b>1x10<sup>-8</sup></b>     | <b>5x10<sup>-7</sup></b>            |
|                                | <b>Firmicutes</b>                   | <b>2x10<sup>-12</sup></b>    | <b>7x10<sup>-13</sup></b>           |
|                                | <b>Fusobacteria</b>                 | <b>3x10<sup>-7</sup></b>     | <b>6x10<sup>-13</sup></b>           |
|                                | Patescibacteria                     | 0.15                         | 2x10 <sup>-5</sup>                  |
|                                | <b>Proteobacteria</b>               | <b>7x10<sup>-9</sup></b>     | <b>2x10<sup>-14</sup></b>           |
|                                | <b>Antibiotics (within 90 days)</b> | Actinobacteria               | 0.68                                |
|                                | Bacteria_unclassifie                | 0.58                         | 0.40                                |
|                                | Bacteroidetes                       | 0.18                         | 0.15                                |
|                                | Epsilonbacteraeota                  | 0.37                         | 0.49                                |
|                                | Firmicutes                          | 0.77                         | 0.75                                |
|                                | Fusobacteria                        | 0.91                         | 0.84                                |
|                                | Patescibacteria                     | 0.22                         | 0.10                                |
|                                | Proteobacteria                      | 0.05                         | 0.18                                |
| <b>Birth weight</b>            | Actinobacteria                      | 0.23                         | 0.35                                |
|                                | Bacteria_unclassifie                | 0.07                         | 0.09                                |
|                                | Bacteroidetes                       | 0.29                         | 0.08                                |
|                                | Epsilonbacteraeota                  | 0.26                         | 0.20                                |
|                                | Firmicutes                          | 0.76                         | 0.31                                |
|                                | Fusobacteria                        | 0.66                         | 0.16                                |
|                                | Patescibacteria                     | 0.61                         | 0.44                                |
|                                | Proteobacteria                      | 0.18                         | 0.46                                |
| <b>Exclusive breastfeeding</b> | Actinobacteria                      | 0.91                         | 0.93                                |
|                                | Bacteria_unclassifie                | 0.34                         | 0.37                                |
|                                | Bacteroidetes                       | 0.43                         | 0.66                                |
|                                | Epsilonbacteraeota                  | 0.32                         | 0.61                                |
|                                | Firmicutes                          | 0.71                         | 0.94                                |



|                                  |                      |                    |                    |
|----------------------------------|----------------------|--------------------|--------------------|
|                                  | Fusobacteria         | 0.28               | 0.11               |
|                                  | Patescibacteria      | 2x10 <sup>-3</sup> | 0.08               |
|                                  | Proteobacteria       | 0.04               | 0.23               |
| <b>Morning salivary cortisol</b> | Actinobacteria       | 0.16               | 0.21               |
|                                  | Bacteria_unclassifie | 0.06               | 2x10 <sup>-3</sup> |
|                                  | Bacteroidetes        | 0.09               | 0.15               |
|                                  | Epsilonbacteraeota   | 0.83               | 0.59               |
|                                  | Firmicutes           | 0.88               | 0.96               |
|                                  | Fusobacteria         | 0.11               | 0.62               |
|                                  | Patescibacteria      | 0.72               | 0.25               |
|                                  | Proteobacteria       | 0.30               | 0.34               |
| <b>Gestational age</b>           | Actinobacteria       | 0.19               | 0.81               |
|                                  | Bacteria_unclassifie | 0.20               | 0.61               |
|                                  | Bacteroidetes        | 0.22               | 0.44               |
|                                  | Epsilonbacteraeota   | 8x10 <sup>-4</sup> | 0.40               |
|                                  | Firmicutes           | 0.49               | 0.22               |
|                                  | Fusobacteria         | 0.06               | 0.13               |
|                                  | Patescibacteria      | 0.05               | 0.11               |
|                                  | Proteobacteria       | 0.23               | 0.29               |

**Supplementary table 4. Sensitivity regression analysis of beta diversity using PERMANOVA**

| Microbiota outcome                  | Exposure                        | p-value            | N  | Significance using PERMANOVA† | Significance in main analysis using NMDS* |
|-------------------------------------|---------------------------------|--------------------|----|-------------------------------|-------------------------------------------|
| Beta diversity in child (PERMANOVA) | Age                             | 5x10 <sup>-4</sup> | 59 | 1                             | 1                                         |
|                                     | Antibiotics (ever-use)          | 0.18               | 59 | 0                             | 0                                         |
|                                     | Antibiotics (within 90 days)    | 0.24               | 59 | 0                             | 0                                         |
|                                     | Birth weight                    | 0.10               | 59 | 0                             | 0                                         |
|                                     | Exclusive breastfeeding         | 0.02               | 49 | 1                             | 1                                         |
|                                     | Furry pet                       | 0.55               | 49 | 0                             | 0                                         |
|                                     | Gestational age                 | 0.26               | 59 | 0                             | 1                                         |
|                                     | Maternal beta diversity (NMDS1) | 0.18               | 55 | 0                             | 0                                         |
|                                     | Maternal beta diversity (NMDS2) | 0.76               | 55 | 0                             | 0                                         |
|                                     | Morning salivary cortisol       | 0.99               | 57 | 0                             | 0                                         |
|                                     | Parity                          | 0.21               | 59 | 0                             | 0                                         |

† Significant result after using the FDR cut-off from main analyses, corresponding to a p-value of 0.0209. 1=yes. 2=no

\* Significant result in main analyses after FDR as well as after sensitivity analysis. 1=yes. 2=no
